# Supplementary material
Source: PubMed Central journal article supplement (PMC5089353)
Supplement: DS_10.1177_1941738116659639_A1.pdf [file DS_10.1177_1941738116659639_A1.pdf]

---

**Appendix 1. ICD-9 codes utilized in study of ankle sprains**

---

| Condition                                                                                                    | ICD-9 code     |
|--------------------------------------------------------------------------------------------------------------|----------------|
| Ankle sprain                                                                                                 |                |
| Lateral                                                                                                      | 845.02, 845.00 |
| Medial                                                                                                       | 845.01         |
| High                                                                                                         | 845.03         |
| Unknown                                                                                                      | 845.09         |
| Pain in joint, ankle, and foot                                                                               | 719.47         |
| <hr/>                                                                                                        |                |
| Sprain of foot NOS (sprain of foot, unspecified site)                                                        | 845.1          |
| <hr/>                                                                                                        |                |
| Lower leg injury NOS (knee, leg, ankle, and foot injury)                                                     | 959.7          |
| Pain in limb                                                                                                 | 729.5          |
| <hr/>                                                                                                        |                |
| Joint effusion-ankle (effusion of joint, ankle, and foot)                                                    | 719.07         |
| Swelling of limb                                                                                             | 729.81         |
| <hr/>                                                                                                        |                |
| Abrasion hip and leg (abrasion or friction burn of hip, thigh, leg, and ankle, without mention of infection) | 916.0          |

---

Procedures were classified according to the clinical classification software for services and procedures developed by the Agency for Healthcare Research and Quality.

[https://www.hcup-us.ahrq.gov/toolssoftware/ccs\\_svcsproc/ccssvcproc.jsp](https://www.hcup-us.ahrq.gov/toolssoftware/ccs_svcsproc/ccssvcproc.jsp)

NOS, not otherwise specified.
