# Supplementary material
Source: PubMed Central journal article supplement (PMC5089353)
Supplement: DS_10.1177_1941738116659639_A2.pdf [file DS_10.1177_1941738116659639_A2.pdf]

**Table 3. Characteristics of demographics for lateral and medial ankle sprains pre- and post-propensity score match**

|                                     | Pre-Match       |               |                | Post-Match     |               |                |
|-------------------------------------|-----------------|---------------|----------------|----------------|---------------|----------------|
|                                     | N (%)           |               |                | N (%)          |               |                |
| <b>Total primary ankle injuries</b> | 207,100         |               |                | 1148           |               |                |
| <b>Type</b>                         | <b>Lateral</b>  | <b>Medial</b> | <b>P Value</b> | <b>Lateral</b> | <b>Medial</b> | <b>P Value</b> |
| Total ankle injuries of each type   | 206,523 (99.72) | 577 (0.28)    |                | 574 (50)       | 574 (50)      |                |
| <b>Sex</b>                          |                 |               | 0.01           |                |               | 0.23           |
| Male                                | 89,175 (43.18)  | 279 (48.35)   |                | 258 (44.95)    | 277 (48.26)   |                |
| Female                              | 117,338 (56.82) | 298 (51.65)   |                | 316 (55.05)    | 297 (51.74)   |                |
| <b>Age, y</b>                       |                 |               | <0.01          |                |               | >0.999         |
| ≤13                                 | 28,746 (13.92)  | 102 (17.68)   |                | 102 (17.77)    | 102 (17.77)   |                |
| 14-17                               | 29,332 (14.20)  | 115 (19.93)   |                | 115 (20.03)    | 115 (20.03)   |                |
| 18-25                               | 41,713 (20.20)  | 109 (18.89)   |                | 106 (18.07)    | 106 (18.07)   |                |
| 26-35                               | 39,935 (19.34)  | 92 (15.94)    |                | 92 (16.03)     | 92 (16.03)    |                |
| 36-49                               | 37,813 (18.31)  | 96 (16.64)    |                | 96 (16.72)     | 96 (16.72)    |                |
| 50-64                               | 19,979 (9.67)   | 46 (7.97)     |                | 46 (8.01)      | 46 (8.01)     |                |
| ≥65                                 | 9005 (4.36)     | 17 (2.95)     |                | 17 (2.96)      | 17 (2.96)     |                |
| <b>Median Household Income, \$</b>  |                 |               | <0.01          |                |               | >0.999         |
| ≤40,999                             | 66,696 (32.88)  | 331 (57.57)   |                | 331 (57.67)    | 331 (57.67)   |                |
| 41,000-50,999                       | 59,788 (28.99)  | 110 (19.13)   |                | 110 (19.16)    | 110 (19.16)   |                |
| 51,000-66,999                       | 42,723 (21.06)  | 74 (12.87)    |                | 74 (12.89)     | 74 (12.89)    |                |
| 67,000+                             | 34,613 (17.07)  | 60 (19.43)    |                | 59 (10.28)     | 59 (10.28)    |                |
| <b>Primary payer</b>                |                 |               | <0.01          |                |               | >0.999         |
| Medicare                            | 15,680 (7.63)   | 25 (4.34)     |                | 25 (4.36)      | 25 (4.36)     |                |
| Medicaid                            | 53,524 (26.04)  | 112 (19.44)   |                | 111 (19.34)    | 111 (19.34)   |                |
| Private insurance                   | 82,326 (40.05)  | 285 (49.48)   |                | 285 (49.65)    | 285 (49.65)   |                |
| Self-pay                            | 38,300 (18.63)  | 122 (21.18)   |                | 121 (21.08)    | 121 (21.08)   |                |
| No charge                           | 1317 (0.64)     | 0             |                | 32 (5.57)      | 32 (5.57)     |                |
| Other                               | 14,388 (7.0)    | 32 (5.56)     |                |                |               |                |

**Table 4. Characteristics of demographics for lateral and high ankle sprains pre- and post-propensity score match**

|                                     | Pre-Match       |             |                | Post-Match     |             |                |
|-------------------------------------|-----------------|-------------|----------------|----------------|-------------|----------------|
|                                     | N (%)           |             |                | N (%)          |             |                |
| <b>Total primary ankle injuries</b> | 206,924         |             |                | 792            |             |                |
| <b>Type</b>                         | <b>Lateral</b>  | <b>High</b> | <b>P Value</b> | <b>Lateral</b> | <b>High</b> | <b>P Value</b> |
| Total ankle injuries of each type   | 206,523 (99.80) | 401 (0.20)  |                | 396 (50)       | 396 (50)    |                |
| <b>Sex</b>                          |                 |             | <0.01          |                |             | >0.999         |
| Male                                | 89,175 (43.18)  | 202 (50.37) |                | 200 (50.51)    | 200 (50.51) |                |
| Female                              | 117,338 (56.82) | 199 (49.63) |                | 196 (49.49)    | 196 (49.49) |                |
| <b>Age, y</b>                       |                 |             | 0.01           |                |             | >0.999         |
| ≤13                                 | 28,746 (13.92)  | 39 (9.73)   |                | 39 (9.85)      | 39 (9.85)   |                |
| 14-17                               | 29,332 (14.20)  | 76 (18.95)  |                | 76 (19.19)     | 76 (19.19)  |                |
| 18-25                               | 41,713 (20.20)  | 84 (20.95)  |                | 83 (20.96)     | 83 (20.96)  |                |
| 26-35                               | 39,935 (19.34)  | 90 (22.44)  |                | 88 (22.22)     | 88 (22.22)  |                |
| 36-49                               | 37,813 (18.31)  | 67 (16.71)  |                | 65 (16.41)     | 65 (16.41)  |                |
| 50-64                               | 19,979 (9.67)   | 31 (7.73)   |                | 31 (7.83)      | 31 (7.83)   |                |
| ≥65                                 | 9005 (4.36)     | 14 (3.49)   |                | 14 (3.54)      | 14 (3.54)   |                |
| <b>Median household income, \$</b>  |                 |             | 0.01           |                |             | >0.999         |
| ≤40,999                             | 66,696 (32.88)  | 116 (29.29) |                | 116 (29.29)    | 116 (29.29) |                |
| 41,000-50,999                       | 59,788 (28.99)  | 143 (36.11) |                | 143 (36.11)    | 143 (36.11) |                |
| 51,000-66,999                       | 42,723 (21.06)  | 78 (19.70)  |                | 78 (19.70)     | 78 (19.70)  |                |
| 67,000+                             | 34,613 (17.07)  | 59 (14.90)  |                | 59 (14.90)     | 59 (14.90)  |                |
| <b>Primary payer</b>                |                 |             | 0.79           |                |             | 0.68           |
| Medicare                            | 15,680 (7.63)   | 32 (8.14)   |                | 24 (6.07)      | 32 (8.25)   |                |
| Medicaid                            | 53,524 (26.04)  | 90 (22.90)  |                | 99 (25.06)     | 89 (22.94)  |                |
| Private insurance                   | 82,326 (40.05)  | 162 (41.22) |                | 166 (42.03)    | 160 (41.24) |                |
| Self-pay                            | 38,300 (18.63)  | 76 (19.34)  |                | 73 (18.48)     | 75 (19.33)  |                |
| No charge                           | 1317 (0.64)     | 2 (0.51)    |                | 5 (1.27)       | 2 (0.52)    |                |
| Other                               | 14,388 (7.0)    | 31 (7.89)   |                | 28 (7.09)      | 30 (7.72)   |                |

**Table 5. Comparison of outcomes in propensity score matched groups**

|                                                                                            | Post-Match      |                |                | Post-Match        |                    |                |
|--------------------------------------------------------------------------------------------|-----------------|----------------|----------------|-------------------|--------------------|----------------|
|                                                                                            | N (%)           |                |                | N (%)             |                    |                |
| <b>Total primary ankle injuries</b>                                                        | 1148            |                |                | 792               |                    |                |
|                                                                                            | <b>Lateral</b>  | <b>Medial</b>  | <b>P Value</b> | <b>Lateral</b>    | <b>High</b>        | <b>P Value</b> |
|                                                                                            | 574 (50)        | 574 (50)       |                | 396 (50)          | 396 (50)           |                |
| <b>Total charge, \$</b>                                                                    |                 |                | <0.01          |                   |                    | 0.97           |
| Mean (SD)                                                                                  | 1127.96 (677)   | 1190.05 (2460) |                | 1275.74 (993.26)  | 3371.37 (9203.80)  |                |
| Median (IQR)                                                                               | 1008 (702-1408) | 914 (741-1108) |                | 1057 (727.5-1498) | 1047.50 (757-1403) |                |
| <b>Hospitalizations</b>                                                                    | 0               | 4 (0.69)       | 0.04           | 1 (0.25)          | 24 (6.06)          | <0.01          |
| <b>Complications</b>                                                                       |                 |                |                |                   |                    |                |
| Pain in joint, ankle, and foot                                                             | 38 (6.62)       | 37 (6.45)      | 0.90           | 36 (9.09)         | 14 (3.53)          | <0.01          |
| Sprain of foot NOS (sprain of foot, unspecified site)                                      | 17 (2.96)       | 4 (0.70)       | <0.01          | 16 (4.04)         | 6 (1.51)           | 0.03           |
| Pain in limb                                                                               | 11 (1.92)       | 3 (0.52)       | 0.03           | 10 (2.52)         | 9 (2.27)           | 0.81           |
| Lower leg injury NOS (knee, leg, ankle, and foot injury)                                   | 10 (1.74)       | 11 (1.92)      | 0.82           | 7 (1.76)          | 1 (0.25)           | 0.03           |
| Abrasion hip and leg (abrasion of hip, thigh, leg, and ankle without mention of infection) | 9 (1.57)        | 2 (0.35)       | 0.03           | 7 (1.76)          | 4 (1.01)           | 0.36           |
| <b>Procedures</b>                                                                          |                 |                |                |                   |                    |                |
| Other diagnostic radiology and related techniques                                          | 460 (83.62)     | 562 (97.91)    | <0.01          | 343 (86.61)       | 360 (90.90)        | 0.24           |
| Traction, splints, and other wound care                                                    | 87 (15.16)      | 72 (12.54)     | 0.29           | 72 (18.18)        | 91 (22.97)         | 0.09           |
| Durable medical equipment and supplies                                                     | 35 (6.10)       | 25 (4.36)      | 0.33           | 34 (8.58)         | 30 (7.57)          | 0.88           |
| Other therapeutic procedures                                                               | 26 (4.53)       | 29 (5.05)      | 0.44           | 23 (5.80)         | 19 (4.79)          | 0.85           |
| Medications (Injections and other forms)                                                   | 16 (2.79)       | 5 (0.87)       | <0.01          | 18 (4.54)         | 38 (9.59)          | 0.26           |

NOS, not otherwise specified.
